# Supplementary material for: Circular RNA circMAN1A2 promotes ovarian cancer progression through the microRNA-135a-3p/IL1RAP/TAK1 pathway
Source: PeerJ journal article supplement (doi:10.7717/peerj.16967), 2024-04-24
Supplement: RawDataFigs456.zip [file RawDataFigs456.zip]

## Sheet: Sheet1
Figure 4A
	mimics nc			mimics			mimics+ov-con			mimics +ov-circMAN1A2
0 h	0.317	0.307	0.311	0.342	0.343	0.336	0.343	0.326	0.301	0.33	0.328	0.327
24 h	0.534	0.495	0.543	0.517	0.425	0.467	0.481	0.443	0.476	0.56	0.522	0.518
48 h	1.08	1.079	1.063	0.746	0.788	0.676	0.685	0.687	0.737	1.121	0.957	1.032
72 h	1.464	1.492	1.541	1.096	1.068	1.108	1.037	0.979	1.057	1.636	1.598	1.63
Figure 4B
mimics nc	mimics	mimics+ov-con	mimics +ov-circMAN1A2
47	20.91	27.17	34.74
44.21	26.47	20.59	36
45.71	20.37	21.05	35.29
Figure 4C
mimics nc	mimics	mimics+ov-con	mimics +ov-circMAN1A2
171	16	19	175
181	20	18	189
165	21	25	173
Figure 4D
mimics nc	mimics	mimics+ov-con	mimics +
			ov-circMAN1A2
29.17	10.58	10.58	36.02
33	17.16	17.87	28.57
29.67	15.61	20.7	34.56
Figure 4E
	G1			S			G2
mimics nc	64.82	62.73	65.26	15.61	16.32	17.53	19.57	20.95	17.21
mimics	79.14	80.13	78.24	10.62	9.89	12.52	10.24	9.98	9.24
mimics+ov-con	78	77.52	80.63	11.58	10.15	9.34	10.42	12.33	10.03
mimics +	65.15	64.25	60.12	14.07	15.7	16.54	20.79	20.05	23.34
ov-circMAN1A2
